# Supplementary material for: Relationship between characters of chest pain and pre-hospital delay in patients with acute myocardial infarction: a multicenter cross-sectional study
Source: Research Square preprint supplement (doi:10.21203/rs.3.rs-1417223/v1), 2022-03-09
Supplement: Supplementary file 1 [file 6bfe087f6510b4d9f1b041c8.docx]

**Table S1.** Pairwise comparison of PHT in subgroups with different severity of the pain.

| *p* value |  | | not at all | | --- | | a little | medium | strong | | very strong | | --- | |
| --- | --- | --- | --- | --- | --- | --- | --- | --- |
|  | PHT | 320.0 | 190.0 | 129.0 | 156.0 | 109.5 |
| | not at all | | --- | | 320.0 | - | 0.257 | 0.026 | 0.010 | 0.008 |
| a little | 190.0 | 0.257 | - | 0.176 | 0.069 | 0.056 |
| medium | 129.0 | 0.026 | 0.176 | - | 0.727 | 0.477 |
| strong | 156.0 | 0.010 | 0.069 | 0.727 | - | 0.631 |
| | very strong | | --- | | 109.5 | 0.008 | 0.056 | 0.477 | 0.631 | - |

**Table S2.** Pairwise comparison of DT in subgroups with different severity of the pain.

| *p* value |  | | not at all | | --- | | a little | medium | strong | | very strong | | --- | |
| --- | --- | --- | --- | --- | --- | --- | --- | --- |
|  | DT | 285.0 | 150.0 | 60.0 | 82.5 | 50.0 |
| | not at all | | --- | | 285.0 | - | 0.376 | 0.057 | 0.012 | 0.002 |
| a little | 150.0 | 0.376 | - | 0.200 | 0.036 | 0.007 |
| medium | 60.0 | 0.057 | 0.200 | - | 0.461 | 0.101 |
| strong | 82.5 | 0.012 | 0.036 | 0.461 | - | 0.242 |
| | very strong | | --- | | 50.0 | 0.002 | 0.007 | 0.101 | 0.242 | - |

**Table S3.** Pairwise comparison of PHT in subgroups with different impact of pain on daily life.

| *p* value |  | | not at all | | --- | | a little | medium | strong | | very strong | | --- | |
| --- | --- | --- | --- | --- | --- | --- | --- | --- |
|  | PHT | 188.5 | 202.5 | 200.0 | 156.0 | 111.5 |
| | not at all | | --- | | 188.5 | - | 0.177 | 0.011 | 0.015 | 0.002 |
| a little | 202.5 | 0.177 | - | 0.066 | 0.094 | 0.004 |
| medium | 200.0 | 0.011 | 0.066 | - | 0.719 | 0.454 |
| strong | 156.0 | 0.015 | 0.094 | 0.719 | - | 0.188 |
| | very strong | | --- | | 111.5 | 0.002 | 0.004 | 0.454 | 0.188 | - |

**Table S4.** Pairwise comparison of DT in subgroups with different impact of pain on daily life.

| *p* value |  | | not at all | | --- | | a little | medium | strong | | very strong | | --- | |
| --- | --- | --- | --- | --- | --- | --- | --- | --- |
|  | DT | 142.5 | 150.0 | 165.0 | 82.5 | 50.0 |
| | not at all | | --- | | 142.5 | - | 0.174 | 0.015 | 0.015 | 0.002 |
| a little | 150.0 | 0.174 | - | 0.097 | 0.092 | 0.003 |
| medium | 165.0 | 0.015 | 0.097 | - | 0.877 | 0.301 |
| strong | 82.5 | 0.015 | 0.092 | 0.877 | - | 0.162 |
| | very strong | | --- | | 50.0 | 0.002 | 0.003 | 0.301 | 0.162 | - |
